*test*

- ME
- Permutation

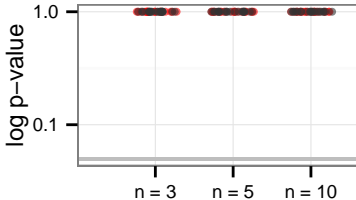

Source: https://storage.googleapis.com/plos-corpus-prod/10.1371/journal.pcbi.1003503/1/pcbi.1003503.s002.pdf?X-Goog-Algorithm=GOOG4-RSA-SHA256&X-Goog-Credential=wombat-sa%40plos-prod.iam.gserviceaccount.com%2F20210617%2Fauto%2Fstorage%2Fgoog4_request&X-Goog-Date=20210617T062811Z&X-Goog-Expires=86400&X-Goog-SignedHeaders=host&X-Goog-Signature=6f7ae8f08febcc0a2b163b0fa59128041d0d26ba653c927f7aea1320f5a25bcafa8c83164d259ce3e6207421ef88f955793b508f9572f9bc544200b66ce354b3a324e01e998ff31e54aefd269afcd70a09fa4d0cfa8608a357b2f281070110ea32d21affc67205ae3665a4071d6857dd3c330cccb41f7f65b508ea4fe9ede1a284b3458cb321ad24cc27c01d31dcacdc282507eeba4a9adb0f32bdb5aab1a363d58d869f7cef4fd759ea5ef6adf6b07364e3f59d4bfffb6e28e3d60f097a4840247d639e4e1e1a2cb37e4526e96eb3c4944c79d3f5c6b34e9ab96e0764778eedd0338835e9043e1bf089f04128ef722974e14d16392beabba70c7ec5068131de
