# Supplementary material for: Modeling Mutual Exclusivity of Cancer Mutations
Source: PLOS journal article supplement (doi:10.1371/journal.pcbi.1003503), 2014-03-27
Supplement: S8 (10.1371/journal.pcbi.1003503.s008) [file journal.pcbi.1003503.s008]

| Model                                        | True error rates                                       | $m$  | RMSE $\gamma$ | RMSE $\delta$ | RMSE $\alpha$ | RMSE $\beta$ |
|----------------------------------------------|--------------------------------------------------------|------|---------------|---------------|---------------|--------------|
| Reduced,<br>assuming $\alpha = 0, \beta = 0$ | $\alpha = 0, \beta = 0$                                | 200  | 0.032         | 0.0106        | –             | –            |
|                                              |                                                        | 1000 | 0.0145        | 0.0052        | –             | –            |
| Known $\alpha, \beta$                        | $\alpha \in (0.03, 0.06),$<br>$\beta \in (0.04, 0.08)$ | 200  | 0.0455        | 0.0227        | –             | –            |
|                                              |                                                        | 1000 | 0.01996       | 0.0109        | –             | –            |
| Unknown $\alpha,$<br>assuming $\beta = 0$    | $\alpha \in (0.02, 0.05),$<br>$\beta = 0$              | 200  | 0.1146        | 0.0515        | 0.0399        | –            |
|                                              |                                                        | 1000 | 0.0815        | 0.0283        | 0.0344        | –            |
| Unknown $\alpha, \beta$                      | $\alpha \in (0.03, 0.06),$<br>$\beta \in (0.04, 0.08)$ | 200  | 0.297         | 0.0692        | 0.0395        | 0.546        |
|                                              |                                                        | 1000 | 0.305         | 0.0455        | 0.03459       | 0.539        |
