# Supplementary material for: Modeling Mutual Exclusivity of Cancer Mutations
Source: PLOS journal article supplement (doi:10.1371/journal.pcbi.1003503), 2014-03-27
Supplement: S14 (10.1371/journal.pcbi.1003503.s014) [file journal.pcbi.1003503.s014]

| Model                                  | average EM runtime |
|----------------------------------------|--------------------|
| Given error rates $\alpha$ and $\beta$ | 1.242621           |
| Given $\beta = 0$ , $\alpha$ unknown   | 93.23118           |
| $\beta$ and $\alpha$ unknown           | 102.0186           |
