# Supplementary material for: Modeling Mutual Exclusivity of Cancer Mutations
Source: PLOS journal article supplement (doi:10.1371/journal.pcbi.1003503), 2014-03-27
Supplement: S15 (10.1371/journal.pcbi.1003503.s015) [file journal.pcbi.1003503.s015]

## Text S1 Modeling mutual exclusivity of cancer mutations

Ewa Szczurek<sup>1</sup>, Niko Beerenwinkel<sup>1,\*</sup>

**1 Department of Biosystems Science and Engineering, ETH Zurich, Basel, Switzerland;  
SIB Swiss Institute of Bioinformatics**

\* **E-mail: niko.beerenwinkel@bsse.ethz.ch**

### Likelihood in the mutual exclusivity model

The complete data likelihood of a given observation  $\mathbf{y} = (y_1, \dots, y_n)$  in the mutual exclusivity model, given the parameters, factorizes according to conditional independencies in the model:

$$P(\mathbf{y}, C, H, T | \theta) = \gamma^C (1 - \gamma)^{1-C} \frac{1}{n} \prod_g ((0^{1-T_g})^{C H_g} (\delta^{T_g} (1 - \delta)^{1-T_g})^{C(1-H_g)} (0^{T_g})^{1-C} \epsilon(y_g, T_g)) \quad (1)$$

Here, for convenience, the mutually mutated gene is specified by a vector of binary random variables  $H = (H_1, \dots, H_n)$ , only one of which can be assigned value 1 at a time:  $P(H_g = 1) = \frac{1}{n}$ , and  $H_g = 1$  implies that  $H_{g'} = 0$  for all  $g' \neq g$ .

To obtain  $P(\mathbf{y} | \theta)$ , the observed likelihood for observation  $\mathbf{y}$  (equation 1 in the main text), we need to marginalize the hidden variables out. This likelihood depends only on the number  $k$  of values 1 in this observation, its length  $n$ , and on the parameters  $\theta$ , and will be shortly denoted  $f_\theta(k, n)$ . Let  $d = \delta(1 - \beta) + (1 - \delta)\alpha$ .

$$\begin{aligned} f_\theta(k, n) &= \sum_c \sum_h \sum_{\mathbf{t}} P(C = c) P(H = h) P(\mathbf{y}, \mathbf{t} | C = c, H = h, \theta) \\ &= (1 - \gamma) \prod_g \sum_{t_g} P(y_g | t_g) P(t_g | C = 0) + \frac{\gamma}{n} \sum_{g'} \prod_g \sum_{t_g} P(y_g | t_g) P(t_g | C = 1, H_{g'} = 1) \\ &= (1 - \gamma) \alpha^k (1 - \alpha)^{n-k} + \frac{\gamma}{n} d^{k-1} (1 - d)^{n-k-1} (k(1 - \beta)(1 - d) + (n - k)\beta d). \end{aligned} \quad (2)$$

Thus, knowing  $k$ , the observed likelihood for one observation can be computed in constant time, which is possible since we assumed  $P(H_g = 1) = \frac{1}{n}$ . Parametrizing the distribution of  $H$ , for example by allowing parameters  $p_g = P(H_g = 1)$ , with  $\sum_g p_g = 1$ , would increase the complexity of computing this likelihood to  $O(n)$ . The likelihood value would no longer only depend on the number  $k$  of non-zero values, but also on which entries in the observation were non-zero. Consequently, computation of the observed likelihood of the entire dataset, now requiring initial  $mn$  pre-computing steps and  $n + 1$  steps of constant time complexity (equation 2 in the main text), would change its complexity to  $O(mn)$ . This is important for the EM algorithm, which performs the initial pre-computation once, and the likelihood is computed for all iterations in  $O(n + 1)$ .

### Identifiability of the mutual exclusivity model

We first formally prove that the four model parameters in  $\theta = \{\gamma, \delta, \alpha, \beta\}$  are identifiable from the data.

**Proposition 1** For  $n \geq 3$ , the parameters in the mutual exclusivity model are identifiable.

**Proof.** Consider a mapping from the parameter space  $\Theta$  to the probability simplex  $\Delta$  defined by the probabilities  $P(\mathbf{y}|\theta)$  for all possible observations  $\mathbf{y}$  (equation 2 above). We need to show that this mapping is invertible.

We construct the Jacobian matrix with columns corresponding to the four parameters in  $\theta$ , and rows to all possible observations. There are  $n + 1$  groups of identical rows, one group per the number of values 1 in the observations in this group, denoted  $k$ . Thus, already with  $n \geq 3$ , the Jacobian has at least 4 unique rows. Each unique row is of the form

$$\left[ \frac{\partial f_\theta(k, n)}{\partial \gamma}, \frac{\partial f_\theta(k, n)}{\partial \delta}, \frac{\partial f_\theta(k, n)}{\partial \alpha}, \frac{\partial f_\theta(k, n)}{\partial \beta} \right],$$

with the individual entries defined by:

$$\frac{\partial f_\theta(k, n)}{\partial \gamma} = -\alpha^k (1 - \alpha)^{n-k} + \frac{1}{n} d^{k-1} (1 - d)^{n-k-1} (k(1 - \beta)(1 - d) + (n - k)\beta d),$$

$$\frac{\partial f_\theta(k, n)}{\partial \delta} = \frac{\gamma}{n} (1 - \alpha - \beta) d^{k-2} (1 - d)^{n-k-2} (k(1 - \beta)(1 - d)(k - 1 - dn + d) + (n - k)\beta d(k - dn + d)),$$

$$\begin{aligned} \frac{\partial f_\theta(k, n)}{\partial \alpha} &= (1 - \gamma) \alpha^{k-1} (1 - \alpha)^{n-k-1} (k - \alpha n) + \\ &\quad \frac{\gamma}{n} (1 - \delta) d^{k-2} (1 - d)^{n-k-2} (k(1 - \beta)(1 - d)(k - 1 - dn + d) + (n - k)\beta d(k - dn + d)), \end{aligned}$$

$$\frac{\partial f_\theta(k, n)}{\partial \beta} = \frac{\gamma}{n} (1 - \delta) d^{k-2} (1 - d)^{n-k-2} (d(1 - d)(nd - k) - k(1 - \beta)\delta(1 - d)(k - 1 - dn + d) - (n - k)\beta \delta d(k - dn + d)).$$

To prove that this Jacobian is full rank, we only need to show that any of its four by four sub-matrices is of rank four. We choose the sub-matrix with simple expressions for the partial derivatives, by selecting four unique rows in the Jacobian, with values  $k$  equal to 0, 1,  $n - 1$ , and  $n$ , respectively. For those values, many of the terms in the above equations cancel out. The resulting sub-matrix

$$\begin{bmatrix} \frac{\partial f_\theta(0, n)}{\partial \gamma} & \frac{\partial f_\theta(0, n)}{\partial \delta} & \frac{\partial f_\theta(0, n)}{\partial \alpha} & \frac{\partial f_\theta(0, n)}{\partial \beta} \\ \frac{\partial f_\theta(1, n)}{\partial \gamma} & \frac{\partial f_\theta(1, n)}{\partial \delta} & \frac{\partial f_\theta(1, n)}{\partial \alpha} & \frac{\partial f_\theta(1, n)}{\partial \beta} \\ \frac{\partial f_\theta(n-1, n)}{\partial \gamma} & \frac{\partial f_\theta(n-1, n)}{\partial \delta} & \frac{\partial f_\theta(n-1, n)}{\partial \alpha} & \frac{\partial f_\theta(n-1, n)}{\partial \beta} \\ \frac{\partial f_\theta(n, n)}{\partial \gamma} & \frac{\partial f_\theta(n, n)}{\partial \delta} & \frac{\partial f_\theta(n, n)}{\partial \alpha} & \frac{\partial f_\theta(n, n)}{\partial \beta} \end{bmatrix}$$

has its reduced row echelon form of the identity matrix. With no zero-rows in the row echelon form we conclude that the sub-matrix is of rank four, and thus, for  $n \geq 3$  and generic parameters, the whole Jacobian is of full rank, and the mapping is invertible.

## Derivation of the Expectation Maximization algorithm

The complete log likelihood of the whole dataset  $\mathbf{Y} = \{\mathbf{y}_1, \dots, \mathbf{y}_m\}$  in the mutual exclusivity model reads

$$\begin{aligned}
\log(P(\mathbf{Y}, C, H, T|\theta)) &= \sum_p \left( C_p \log(\gamma) + (1 - C_p) \log(1 - \gamma) - \log(n) + \right. \\
&\quad \sum_g \left( \log(0^{C_p H_{pg}(1-T_{pg})}) + \right. \\
&\quad C_p(1 - H_{pg})T_{pg} \log(\delta) + C_p(1 - H_{pg})(1 - T_{pg}) \log(1 - \delta) + \\
&\quad \log(0^{(1-C_p)T_{pg}}) + \\
&\quad T_{pg}y_{pg} \log(1 - \beta) + T_{pg}(1 - y_{pg}) \log(\beta) + \\
&\quad \left. \left. (1 - T_{pg})y_{pg} \log(\alpha) + (1 - T_{pg})(1 - y_{pg}) \log(1 - \alpha) \right) \right). \tag{3}
\end{aligned}$$

We show how to use the EM algorithm to estimate parameters in this model. In the E-step, we compute the expected values of relevant variables given the data and the parameters. First, we evaluate

$$\begin{aligned}
\bar{C}_p &= E[C_p|\mathbf{Y}, \theta] = \frac{P(C_p = 1, Y_p|\theta)}{P(Y_p|\theta)} \\
&= \frac{\gamma}{nP(Y_p|\theta)} d^{k_p-1} (1-d)^{n-k_p-1} (k_p(1-\beta)(1-d) + (n-k_p)\beta d), \tag{4}
\end{aligned}$$

Note that since we assume that  $P(H_g = 1) = \frac{1}{n}$ , the nominator in equation (4) can be computed in constant time. This would not be the case if a set of parameters would describe the exclusive mutation frequencies instead, with one parameter per each gene: then, the exact placement of the mutually exclusive alteration in each observation would matter, and the hidden variable values would have to be summed out explicitly, in  $n$  steps. Remarkably, the value of  $\bar{C}_p$  depends only on the number  $k_p$  of values 1 in observation  $p$ . Thus, instead of computing  $m$  values of  $\bar{c}_p$  for each  $p \in \{1, \dots, m\}$ , it suffices to compute  $n+1$  unique values, for each  $k \in \{0, \dots, n\}$ :

$$\bar{c}_k = \frac{\gamma}{nf_\theta(k, n)} d^{k-1} (1-d)^{n-k-1} (k(1-\beta)(1-d) + (n-k)\beta d), \tag{5}$$

where the observed data likelihood  $f_\theta(k, n) = P(Y_p|\theta)$  is computed using equation 2. Next, we compute

$$\overline{C_p T_{pg}} = E[C_p T_{pg}|\mathbf{Y}, \theta] = \frac{P(C_p = 1, T_{pg} = 1, Y_p|\theta)}{P(Y_p|\theta)} \tag{6}$$

This value depends only on the total number of values 1 in observation  $p$ , as well as on whether  $y_{pg} = 0$ , or  $y_{pg} = 1$ . For each  $k \in \{0, \dots, n\}$  we define auxiliary values  $\bar{t}_k^0, \bar{t}_k^1$  respectively. Given that  $k_p = k$  we have

$$\overline{C_p T_{pg}} = \begin{cases} \bar{t}_k^0 & \text{if } y_{pg} = 0, \\ \bar{t}_k^1 & \text{if } y_{pg} = 1, \end{cases}$$

where

$$\bar{t}_k^0 = \frac{\gamma}{nf_\theta(k, n)} \beta d^{k-1} (1-d)^{n-k-2} (d(1-d) + k\delta(1-\beta)(1-d) + (n-k-1)\delta\beta d) \tag{7}$$

$$\bar{t}_k^1 = \frac{\gamma}{nf_\theta(k, n)} (1-\beta) d^{k-2} (1-d)^{n-k-1} (d(1-d) + (k-1)\delta(1-\beta)(1-d) + (n-k)\delta\beta d) \tag{8}$$

Similarly, we compute

$$\overline{C_p H_{pg}} = E[C_p H_{pg} | \mathbf{Y}, \theta] = \frac{P(C_p = 1, H_{pg} = 1, Y_p | \theta)}{P(Y_p | \theta)} \quad (9)$$

and define auxiliary values  $\overline{h_k^0}$  and  $\overline{h_k^1}$  such that, for  $k_p = k$ ,

$$\overline{C_p H_{pg}} = \begin{cases} \overline{h_k^0} & \text{if } y_{pg} = 0, \\ \overline{h_k^1} & \text{if } y_{pg} = 1, \end{cases}$$

where

$$\overline{h_k^0} = \frac{\gamma}{n f_\theta(k, n)} \beta d^k (1-d)^{n-k-1}, \quad (10)$$

and

$$\overline{h_k^1} = \frac{\gamma}{n f_\theta(k, n)} (1-\beta) d^{k-1} (1-d)^{n-k}. \quad (11)$$

Finally, we show that

$$\overline{T_{pg}} = E[T_{pg} | \mathbf{Y}, \theta] = E[C_p T_{pg} | \mathbf{Y}, \theta] = \overline{C_p T_{pg}}. \quad (12)$$

Indeed,

$$E[T_{pg} | \mathbf{Y}, \theta] = P(T_{pg} = 1, C_p = 1 | \mathbf{Y}, \theta) + P(T_{pg} = 1, C_p = 0 | \mathbf{Y}, \theta) = P(T_{pg} = 1, C_p = 1 | \mathbf{Y}, \theta),$$

since by definition  $P(T_{pg} = 1 | C_p = 0) = 0$ . Moreover, we have

$$\overline{C_p H_{pg} T_{pg}} = E[C_p H_{pg} T_{pg} | \mathbf{Y}, \theta] = E[C_p H_{pg} | \mathbf{Y}, \theta] = \overline{C_p H_{pg}}, \quad (13)$$

since  $P(T_{pg} = 1 | H_{pg} = 1) = 1$ . In total, the E-step comprises computations of  $6(n+1)$  values, namely,  $f_\theta(k, n)$ ,  $\overline{c_k}$ ,  $\overline{t_k^0}$ ,  $\overline{t_k^1}$ ,  $\overline{h_k^0}$ ,  $\overline{h_k^1}$ , each for  $k \in \{0, \dots, n\}$ .

In the M-step, we estimate the parameters maximizing the expected complete likelihood, given the estimated expected values of the variables. Let  $k \in \{0, \dots, n\}$ , and  $q_k$  denote the number of observations which have exactly  $k$  entries equal 1. Denote  $\overline{s_k} = k \overline{t_k^1} + (n-k) \overline{t_k^0}$ , the expected number of true mutations in the observation with  $k$  observed mutations. The expected complete likelihood reads

$$\begin{aligned} E[\log(P(\mathbf{Y}, C, H, T | \theta))] &= \sum_p \left( \overline{C_p} \log(\gamma) + (1 - \overline{C_p}) \log(1 - \gamma) - \log(n) + \right. & (14) \\ &\sum_g \left( (\overline{C_p T_{pg}} - \overline{C_p H_{pg}}) \log(\delta) + \right. \\ &(\overline{C_p} - \overline{C_p T_{pg}}) \log(1 - \delta) + \\ &\overline{T_{pg}} y_{pg} \log(1 - \beta) + \overline{T_{pg}} (1 - y_{pg}) \log(\beta) + \\ &\left. (1 - \overline{T_{pg}}) y_{pg} \log(\alpha) + (1 - \overline{T_{pg}}) (1 - y_{pg}) \log(1 - \alpha) \right) \\ &= \sum_k q_k \left( \overline{c_k} \log(\gamma) + (1 - \overline{c_k}) \log(1 - \gamma) + \right. \\ &(\overline{s_k} - \overline{c_k}) \log(\delta) + \\ &(n \overline{c_k} - \overline{s_k}) \log(1 - \delta) + \\ &k \overline{t_k^1} \log(1 - \beta) + (n - k) \overline{t_k^0} \log(\beta) + \\ &\left. k(1 - \overline{t_k^1}) \log(\alpha) + (n - (n - k) \overline{t_k^0}) \log(1 - \alpha) \right), \end{aligned}$$

using equations (12) and (13), and since we have

$$k\bar{h}_k^1 + (n - k)\bar{h}_k^0 = \bar{c}_k.$$

Maximization of the expected complete likelihood with respect to  $\gamma$  gives

$$\tilde{\gamma} = \frac{\sum_k q_k \bar{c}_k}{m}, \quad (15)$$

maximization with respect to  $\delta$  yields

$$\tilde{\delta} = \frac{\sum_k q_k (\bar{s}_k - \bar{c}_k)}{(n - 1) \sum_k q_k \bar{c}_k} \quad (16)$$

Finally, maximization with respect to  $\alpha$  and  $\beta$ , results in, respectively:

$$\tilde{\alpha} = \frac{\sum_k q_k k (1 - \bar{t}_k^1)}{mn - \sum_k q_k \bar{s}_k}, \quad (17)$$

and

$$\tilde{\beta} = \frac{\sum_k q_k (n - k) \bar{t}_k^0}{\sum_k q_k \bar{s}_k}. \quad (18)$$
